# Supplementary material for: Functional Evaluation of Retinal Pigment Epithelium and Outer Retinal Atrophy by High-Density Targeted Microperimetry Testing
Source: PubMed Central journal article supplement — Ophthalmol Sci. 2023 Nov 4;4(2):100425. doi: 10.1016/j.xops.2023.100425 (PMC10772812; doi:10.1016/j.xops.2023.100425), 2023-11-04
Supplement: mmc1.pdf [file mmc1.pdf]

## SUPPLEMENTARY MATERIALS

Supplementary Figure 1 illustrates how the findings of the difference in the number of locations with deep visual sensitivity defects  $\leq 10$  and  $\leq 0$  dB based on the three different set of combinations of optical coherence tomography (OCT) features were also seen when evaluating the mean sensitivity (MS) of all the microperimetry test locations. For the first set of combinations (described in the Results section), the MS was significantly lower for lesions in categories 3 and 4 ( $P \leq 0.001$ ), but not category 2 ( $P = 0.884$ ), when compared to category 1. Lesions in categories 3 and 4 also had a significantly lower MS compared to lesions in categories 2 and 3 respectively (i.e., their lower neighboring category;  $P < 0.001$ ). For the second set of combinations (also described in the Results section), the MS was significantly lower for lesions in categories 2, 3 and 4 when compared to category 1 ( $P \leq 0.023$ ). Lesions in categories 3 and 4 also had a significantly lower MS compared to lesions in categories 2 and 3 respectively ( $P < 0.001$ ). Findings for the third set of combinations (again, described in the Results section) were similar to those for the second set of combinations, where the MS was significant lower for lesions in categories 2, 3, and 4 when compared to category 1 ( $P \leq 0.006$ ). Similarly, lesions in categories 3 and 4 had a significantly lower MS compared to lesions in categories 2 and 3 respectively ( $P < 0.001$ ).

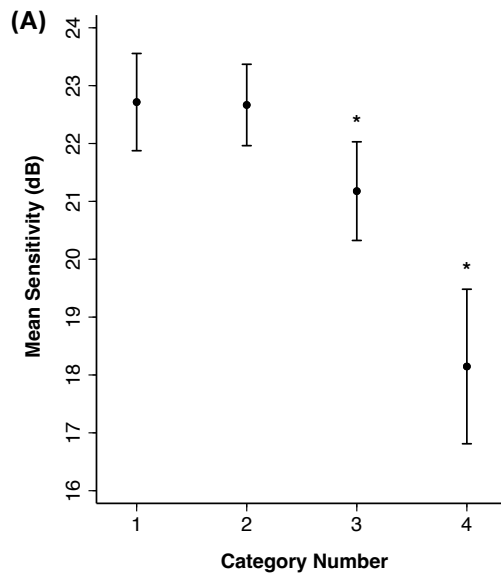

| Category Number                            | 1 | 2 | 3  | 4 |
|--------------------------------------------|---|---|----|---|
| <b>Choroidal Signal Hypertransmission</b>  |   |   |    |   |
| 1 – 249 $\mu\text{m}$                      | ✓ |   |    |   |
| 250 – 499 $\mu\text{m}$                    |   | ✓ |    |   |
| $\geq 500$ $\mu\text{m}$                   |   |   | ✓# | ✓ |
| <b>RPE Attenuation or Disruption</b>       |   |   |    |   |
| 1 – 249 $\mu\text{m}$                      | ✓ |   |    |   |
| $\geq 250$ $\mu\text{m}$                   |   | ✓ | ✓  |   |
| Complete RPE Loss $\geq 250$ $\mu\text{m}$ |   |   | ✓# | ✓ |
| Evidence of Overlying PR Degeneration      | ✓ | ✓ | ✓  | ✓ |

# = presence of either of these two features

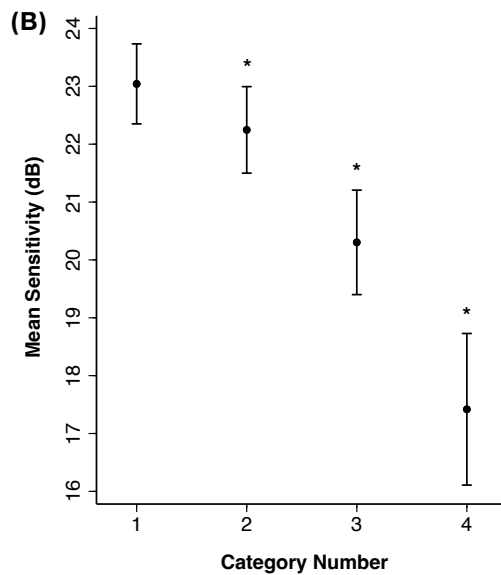

| Category Number                                                                                                       | 1 | 2  | 3  | 4 |
|-----------------------------------------------------------------------------------------------------------------------|---|----|----|---|
| <b>Subsidence of INL and OPL, or Hyporeflective Wedge-Shaped Band, <math>\geq 500</math> <math>\mu\text{m}</math></b> |   |    |    |   |
|                                                                                                                       |   | ✓† | ✓# | ✓ |
| <b>Choroidal Signal Hypertransmission <math>\geq 500</math> <math>\mu\text{m}</math></b>                              |   |    |    |   |
|                                                                                                                       |   | ✓† | ✓# | ✓ |
| <b>Complete RPE Loss <math>\geq 250</math> <math>\mu\text{m}</math></b>                                               |   |    |    |   |
|                                                                                                                       |   | ✓† | ✓# | ✓ |

† = presence of one of these three features  
# = presence of either of these two features

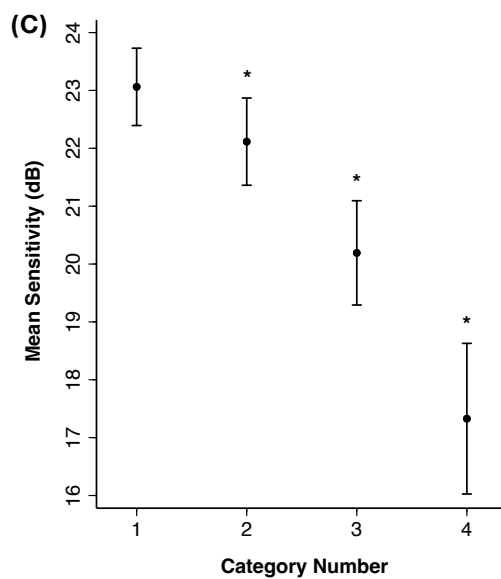

| Category Number                                                                                                       | 1 | 2 | 3  | 4 |
|-----------------------------------------------------------------------------------------------------------------------|---|---|----|---|
| <b>Subsidence of INL and OPL, or Hyporeflective Wedge-Shaped Band, <math>\geq 500</math> <math>\mu\text{m}</math></b> |   |   |    |   |
|                                                                                                                       |   | ✓ | ✓  | ✓ |
| <b>Choroidal Signal Hypertransmission <math>\geq 500</math> <math>\mu\text{m}</math></b>                              |   |   |    |   |
|                                                                                                                       |   |   | ✓# | ✓ |
| <b>Complete RPE Loss <math>\geq 250</math> <math>\mu\text{m}</math></b>                                               |   |   |    |   |
|                                                                                                                       |   |   | ✓# | ✓ |

# = presence of either of these two features

21

22 **Supplementary Figure 1:** Differences in the mean sensitivity (from 37 locations tested) based on  
 23 three different set of combinations of optical coherence tomography (OCT) features (**left**). Each set

24 of combination (**A**, **B** and **C**) involved four categories, and the criteria for meeting each category  
25 are indicated in their respective tables (**right**; “✓” = required feature); lesions were always  
26 assigned the highest category that it met the criteria for. Note: \* = statistically significant at  $P <$   
27 0.05 compared to category 1 or each category compared to their lower neighboring category (e.g.,  
28 category 4 compared to category 3); RPE = retinal pigment epithelium; PR = photoreceptor; INL =  
29 inner nuclear layer; OPL = outer plexiform layer.
